# Supplementary material for: Template-free synthesis of a multilayer manganese oxide/graphene oxide nanoflake-modified carbon felt as an anode material for microbial fuel cells
Source: Royal Society of Chemistry journal article supplement (doi:10.1039/d4ra07323a), 2025-01-01
Supplement: d4ra07323a1.pdf [file d4ra07323a1.pdf]

## **Supplementary information**

### **Template-free synthesis of a multilayer manganese oxide/graphene oxide nanoflake-modified carbon felt as an anode material for microbial fuel cells**

Lizhen Zeng <sup>a</sup> \* and Lixia Zhang <sup>b</sup>

<sup>a</sup> Analysis and testing center, South China Normal University, Guangzhou 510006

<sup>b</sup> CAS Key Laboratory of Environmental and Applied Microbiology, Environmental Microbiology Key Laboratory of Sichuan Province, Chengdu Institute of Biology, Chinese Academy of Sciences, Chengdu 610041, China

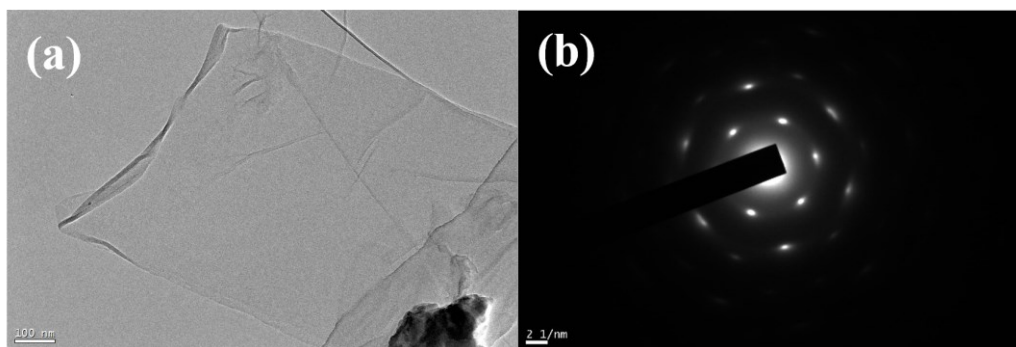

Fig. S1 TEM image (a) and SAED (b) of GO.

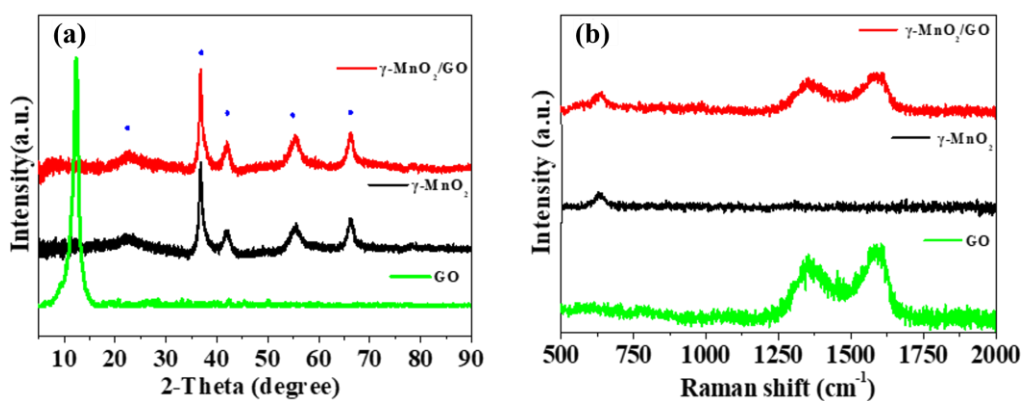

Fig. S2 XRD patterns (a), Raman spectra (b) of GO, pure  $\gamma$ -MnO<sub>2</sub> and  $\gamma$ -MnO<sub>2</sub>/GO composite.

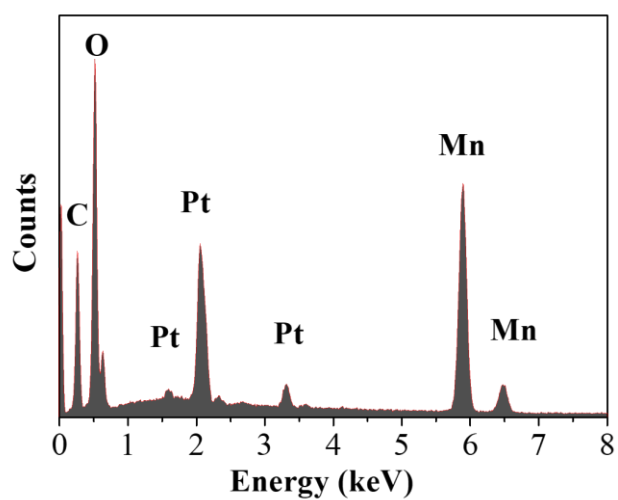

Fig. S3 Energy dispersive spectra analysis of  $\gamma$ -MnO<sub>2</sub>/GO composite.

Table.S1 Summary of the MFC performance with different anode materials in the literatures

| anode                                                     | Inoculum      | $P_{\max}$ (mW m <sup>-2</sup> ) | Reference |
|-----------------------------------------------------------|---------------|----------------------------------|-----------|
| PANI+G+CC                                                 | Mixed culture | 884 ± 96                         | [5]       |
| CSE                                                       | Mixed culture | 759 ± 38                         | [8]       |
| thornless CSE                                             | Mixed culture | 425 ± 21                         | [8]       |
| brush                                                     | Mixed culture | 830 ± 42                         | [8]       |
| Mo <sub>2</sub> C/CCT                                     | Mixed culture | 1120                             | [11]      |
| LSC                                                       | Mixed culture | 701 ± 44                         | [12]      |
| NCP/LSC                                                   | Mixed culture | 1090 ± 72                        | [12]      |
| graphite plate                                            | Mixed culture | 383 ± 21                         | [12]      |
| reticulated vitreous carbon                               | Mixed culture | 650 ± 33                         | [12]      |
| graphene-coated sponge                                    | Mixed culture | 612 ± 39                         | [12]      |
| NC@CCT                                                    | Mixed culture | 931 ± 61                         | [13]      |
| Ni <sub>0.1</sub> Mn <sub>0.9</sub> O <sub>1.45</sub> /CF | Mixed culture | 1390 ± 20                        | [14]      |
| $\gamma$ -MnO <sub>2</sub> /GO/CF                         | Mixed culture | 1130 ± 90                        | This work |

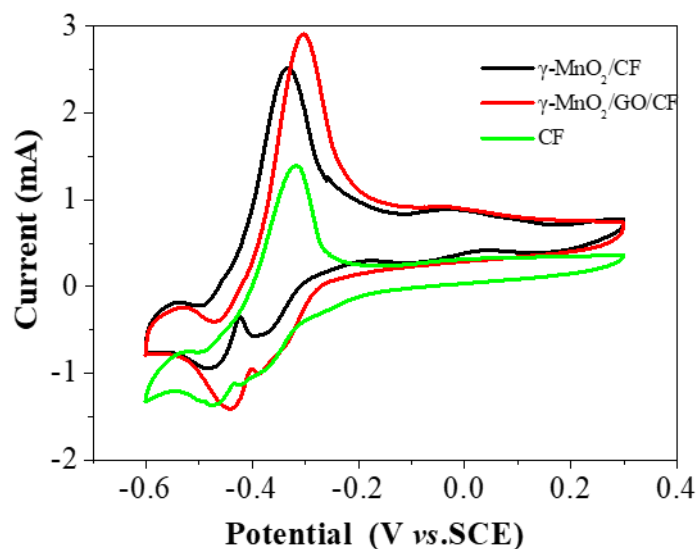

**Fig. S4** Cyclic voltammograms for the  $\gamma$ -MnO<sub>2</sub>/CF,  $\gamma$ -MnO<sub>2</sub>/GO/CF and CF electrodes after inoculation under unturnover conditions (scan rate 5mV s<sup>-1</sup>).

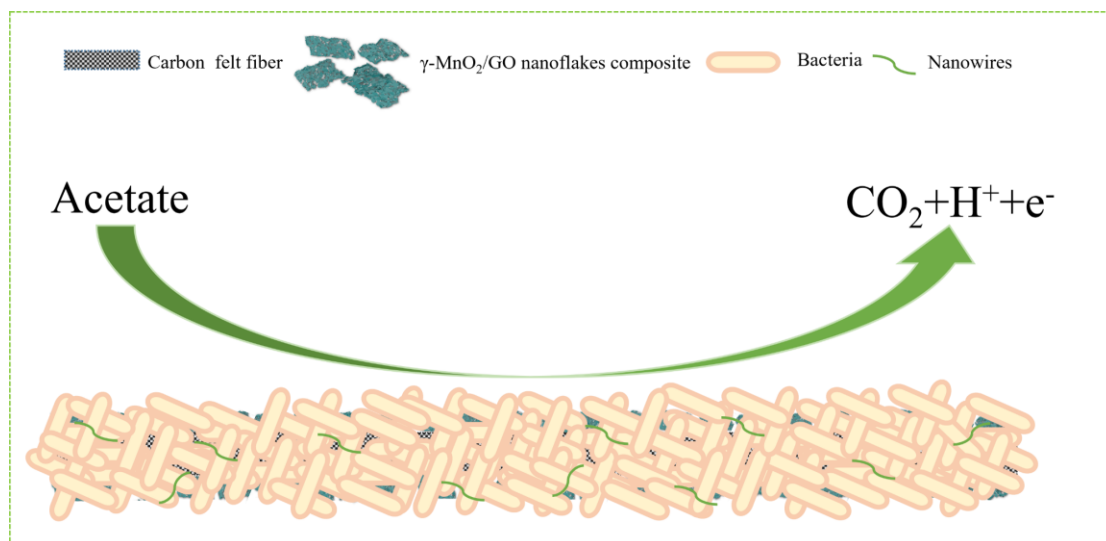

**Fig. S5** Schematic electron-transfer mechanisms of  $\gamma$ -MnO<sub>2</sub>/GO/CF electrode.
